# Supplementary material for: Apixaban in Comparison to Warfarin for Stroke Prevention in Nonvalvular Atrial Fibrillation: A Systematic Review and Meta-Analysis of Observational Studies
Source: Hindawi journal article supplement (doi:10.1155/2019/6419147), 2019-07-07
Supplement: f1 [file 6419147.f1.pdf]

**Supplementary Material:**

**APIXABAN VS WARFARN INTERVENTION**

| STUDY              | POPULATION                                                                                                                                                                    | INTERVENTION                                                                                                                                 | COMPARISON                                                                                                                                           | OUTCOMES                                                                                   | DURATION                                          | STUDY DESIGN                 |
|--------------------|-------------------------------------------------------------------------------------------------------------------------------------------------------------------------------|----------------------------------------------------------------------------------------------------------------------------------------------|------------------------------------------------------------------------------------------------------------------------------------------------------|--------------------------------------------------------------------------------------------|---------------------------------------------------|------------------------------|
| Granger, CB et al. | Adults with age of at least 80 years, a body weight of no more than 60 kg, or a serum creatinine level of 1.5 mg per deciliter (133 $\mu$ mol per liter) or more.             | Apixaban or matching placebo was administered twice daily, with apixaban given in 5-mg doses; 2.5-mg doses were used in a subset of patients | Warfarin (or matching placebo) was provided as 2-mg tablets and was adjusted to achieve a target international normalized ratio (INR) of 2.0 to 3.0. | Apixaban was associated with lower rate of ischemic stroke/systemic Embolism and bleeding. | From December 19, 2006, through April 2, 2010.    | Randomized controlled trail. |
| Larsen, TB et al.  | Adults with non-valvular atrial fibrillation who were naive to oral anticoagulants and had no previous indication for valvular atrial fibrillation or venous thromboembolism. | Apixaban 5mg twice daily.                                                                                                                    | Warfarin 2.5mg tablets with target international normalized ratio (INR) of 2.0 to 3.0.                                                               | Apixaban was associated with lower rate of ischemic stroke/systemic Embolism and bleeding. | From December 10, 2012 through November 30, 2015. | Observational cohort study.  |
| Li, X et al.       | Adults (aged 18 years) with nonvalvular atrial fibrillation who had a pharmacy claim for apixaban or warfarin during the identification period.                               | Apixaban 5mg twice daily and 2.5 mg bid.                                                                                                     | Warfarin with target international normalized ratio (INR) of 2.0 to 3.0.                                                                             | Apixaban was associated with lower rate of ischemic stroke/systemic Embolism and bleeding. | From January 1, 2012 through September 30, 2015.  | Observational cohort study.  |
| Nielsen, PB et al. | Adults with non-valvular atrial fibrillation with a first prescription for an oral anticoagulant.                                                                             | Apixaban 2.5mg bid were identified and followed.                                                                                             | Warfarin with target international normalized ratio (INR) of 2.0 to 3.0.                                                                             | Apixaban with elevated risk of ischemic stroke/systemic embolism and major bleeding.       | From December 10, 2012 through February 28, 2016. | Observational cohort study.  |
| Staerk, L et al.   | Adults with non-valvular atrial                                                                                                                                               | Apixaban 5mg twice daily and 2.5 mg bid.                                                                                                     | Information regarding international                                                                                                                  | Apixaban with elevated risk of ischemic                                                    | From August 22, 2011 through                      | Observational cohort study.  |

|  |                                                                   |  |                                 |                           |                    |  |
|--|-------------------------------------------------------------------|--|---------------------------------|---------------------------|--------------------|--|
|  | fibrillation with a first prescription for an oral anticoagulant. |  | normalized ratio not available. | stroke/systemic embolism. | December 31, 2015. |  |
|--|-------------------------------------------------------------------|--|---------------------------------|---------------------------|--------------------|--|

Table 1: PICO characteristics of the studies.

| Reference          | Group           | Gender |       |       | Age  |      |        |             |
|--------------------|-----------------|--------|-------|-------|------|------|--------|-------------|
|                    |                 | M      | F     | Both  | Mean | SD   | Median | Range       |
| Granger, CB et al. | Apixaban        | 5886   | 3234  | 9120  |      |      | 70     | 63 - 76     |
|                    | Warfarin        | 5899   | 3182  | 9081  |      |      | 70     | 63 - 76     |
| Larsen, TB Et al.  | Apixaban        | 3831   | 2522  | 6353  |      |      | 71.73  | 65.8 – 77.2 |
|                    | Warfarin        | 20838  | 14598 | 35436 |      |      | 72.4   | 64.7 – 79.8 |
| Li, X et al        | Apixaban(5mg)   | 20,007 | 11820 | 31827 | 68.6 | 11.0 |        |             |
|                    | Apixaban(2.5mg) | 2756   | 2760  | 6600  | 82.5 | 9.5  |        |             |
|                    | Warfarin*       | 20,048 | 11779 | 31827 | 69.2 | 11.7 |        |             |
|                    | Warfarin**      | 3844   | 3840  | 6600  | 80.1 | 8.5  |        |             |
| Nielsen, PB er al. | Apixaban        | 1735   | 2665  | 4400  | 83.9 | 8.2  |        |             |
|                    | Warfarin        | 23190  | 15703 | 38893 | 71   | 12.6 |        |             |
| Staerk, L et al.   | Apixaban        | 3439   | 3460  | 6899  |      |      | 76     | 68 - 84     |
|                    | Warfarin        | 10265  | 7829  | 18094 |      |      | 73     | 65 - 80     |

Table 2: Baseline characteristics from each study. \*Baseline characteristics propensity matched to apixaban 5mg. \*\* Baseline characteristics propensity matched to apixaban 2.5mg.

| REFERENCE/OUTCOMES |                          | APIXABAN     |            | WARFARIN     |            | HR(CI)            | P value |
|--------------------|--------------------------|--------------|------------|--------------|------------|-------------------|---------|
|                    |                          | N(n)         | Event rate | N(n)         | Event rate |                   |         |
| Granger, CB et al. | Stroke/systemic embolism | 9120 (212)   | 1.27       | 9081 (265)   | 1.60       | 0.79 (0.66, 0.95) | 0.01    |
|                    | Major bleeding           | 9088 (327)   | 2.13       | 9052 (462)   | 3.09       | 0.69 (0.60, 0.80) | <0.001  |
| Larsen, TB et al.  | Stroke/systemic embolism | 6353 (225)   | 3.32       | 35436 (1447) | 2.33       | 1.08 (0.91, 1.27) |         |
|                    | Major bleeding           | 6353 (109)   | 2.15       | 35436 (1198) | 2.98       | 0.61 (0.49, 0.75) |         |
| Li, X et al.       | Stroke/systemic embolism | 31827 (299)* | 2.15       | 31827 (440)  | 3.04       | 0.70 (0.60, 0.81) | <0.001  |
|                    |                          | 6600 (101)** | 3.51       | 6600 (163)   | 5.28       | 0.63 (0.49, 0.81) | <0.001  |
|                    | Major bleeding           | 31827* (563) | 4.05       | 31827 (977)  | 6.80       | 0.59 (0.53, 0.66) | <0.001  |
|                    |                          | 6600 (188)** | 6.56       | 6600 (326)   | 10.64      | 0.59 (0.49, 0.71) | <0.001  |
| Nielsen, PB et al. | Stroke/systemic embolism | 4400 (236)   | 3.98       | 38893 (1686) | 2.68       | 1.19 (0.95, 1.49) |         |
|                    | Major bleeding           | 4400 (160)   | 3.90       | 38893 (2136) | 3.14       | 1.04 (0.76, 1.43) |         |
| Staerk, L et al.   | Stroke/systemic embolism | 6899 (171)   |            | 18094 (419)  |            | 1.07 (0.87, 1.31) |         |

Table 3: Study results. \*Apixaban 5mg vs warfarin. \*\*Apixaban 2.5mg vs warfarin.

| REFERENCE          | SEQUENCE GENERATION | ALLOCATION CONCEALMENT | BLINDING PARTICIPANTS | BLINDING ASSESSORS | INCOMPLETE OUTCOME DATA | SELECTIVE REPORTING | OTHER BIAS |
|--------------------|---------------------|------------------------|-----------------------|--------------------|-------------------------|---------------------|------------|
| Granger, CB et al. | Yes                 | Yes                    | Yes                   | Yes                | No                      | No                  | None       |

Table 4: Cochrane risk of bias tool for randomized controlled trials.

| QUESTIONS                                                                                                                                        | Larsen, TB et al. | Li, X et al. | Nielsen, PB et al. | Staerk, L et al. |
|--------------------------------------------------------------------------------------------------------------------------------------------------|-------------------|--------------|--------------------|------------------|
| The study addresses an appropriate and clearly focused question.                                                                                 | Yes               | Yes          | Yes                | Yes              |
| The two groups being studied are selected from source populations that are comparable in all respects other than the factor under investigation. | Yes               | Yes          | Yes                | Yes              |

|                                                                                                                                                |     |     |     |     |
|------------------------------------------------------------------------------------------------------------------------------------------------|-----|-----|-----|-----|
| The study indicates how many of the people asked to take part did so, in each of the groups being studied.                                     | No  | No  | No  | No  |
| The likelihood that some eligible subjects might have the outcome at the time of enrolment is assessed and taken into account in the analysis. | Yes | Yes | Yes | Yes |
| What percentage of individuals or clusters recruited into each arm of the study dropped out before the study was completed.                    | NA  | NA  | NA  | NA  |
| Comparison is made between full participants and those lost to follow up, by exposure status.                                                  | NA  | NA  | NA  | NA  |
| The outcomes are clearly defined.                                                                                                              | Yes | Yes | Yes | Yes |
| The assessment of outcome is made blind to exposure status. If the study is retrospective this may not be applicable.                          | NA  | NA  | NA  | NA  |
| Where blinding was not possible, there is some recognition that knowledge of exposure status could have influenced the assessment of outcome.  | Yes | Yes | NA  | Yes |
| The method of assessment of exposure is reliable.                                                                                              | No  | No  | No  | No  |
| Evidence from other sources is used to demonstrate that the method of outcome assessment is valid and reliable.                                | Yes | Yes | Yes | Yes |
| Exposure level or prognostic factor is assessed more than once.                                                                                | No  | No  | No  | No  |
| The main potential confounders are identified and taken into account in the design and analysis.                                               | Yes | Yes | Yes | Yes |
| Have confidence intervals been provided?                                                                                                       | Yes | Yes | Yes | Yes |

Table 5: SIGN risk of bias tool for non-randomized controlled trials.
